# Supplementary material for: Differentiation of Morphological Traits and Genome-Wide Expression Patterns between Rice Subspecies Indica and Japonica
Source: Genes (Basel). 2023 Oct 21;14(10):1971. doi: 10.3390/genes14101971 (PMC10606143; doi:10.3390/genes14101971)
Supplement: Supplementary file 1 [file genes-14-01971-s001.zip › Supplemental Table S1-proofreading.xls]

## Sheet: rice samples
Table S1. Information of 95 rice accessions used in this study
DNA Unique ID	Accession ID	Data Source1	Accession Source2	Accession Name	Genetic Stock Accno	Variety Group3	Origin Province
Indica (56)
B072	ind_CHN_MC01	3KRGP	MC	Qiuqianbai	11-00389	indica	Anhui
B074	ind_CHN_MC02	3KRGP	MC	Taishannuo	I1A04613	indica	Fujian
B075	ind_CHN_MC03	3KRGP	MC	Jinbaoyin	I1A04260	indica	Fujian
B076	ind_CHN_MC04	3KRGP	MC	Minbeiwanxian	I1A19605	indica	Fujian
B079	ind_CHN_MC05	3KRGP	MC	Esiniu	15-01740	indica	Guangdong
B081	ind_CHN_MC06	3KRGP	MC	Heidu 4	I1A44713	indica	Guangdong
B082	ind_CHN_MC07	3KRGP	MC	Qiyuexian	16-06887	indica	Guangxi
B083	ind_CHN_MC08	3KRGP	MC	Dongtingwanxian	17-00435	indica	Hubei
B085	ind_CHN_MC09	3KRGP	MC	Xugunuo	18-01903	indica	Hunan
B087	ind_CHN_MC10	3KRGP	MC	Zhongnong 4	I1A35718	indica	Hubei
B093	ind_CHN_MC15	3KRGP	MC	Qitougu	21-02171	indica	Yunnan
B094	ind_CHN_MC16	3KRGP	MC	Zinuo	21-02224	indica	Yunnan
B106	ind_CHN_MC17	3KRGP	MC	Wenxiangnuo	21-00272	indica	Yunnan
B107	ind_CHN_MC18	3KRGP	MC	Dawannuo	21-01082	indica	Yunnan
B108	ind_CHN_MC19	3KRGP	MC	Xianggu	I1A21188	indica	Sichuan
B129	ind_CHN_MC20	3KRGP	MC	Hongainuo	16-05252	indica	Guangxi
B130	ind_CHN_MC21	3KRGP	MC	Wanlixian	I1A02104	indica	Hunan
B131	ind_CHN_MC22	3KRGP	MC	Aizizhan	I1A27272	indica	Guangdong
B132	ind_CHN_MC23	3KRGP	MC	Xiaobaimi	22-04637	indica	Guizhou
B133	ind_CHN_MC24	3KRGP	MC	Yanshuichi	I1A19911	indica	Fujian
B149	ind_CHN_MC26	3KRGP	MC	Haoxiang	21-02851	indica	Yunnan
B163	ind_CHN_MC27	3KRGP	MC	Liushizao	11-00322	indica	Anhui
B165	ind_CHN_MC28	3KRGP	MC	Haohuangla	21-02852	indica	Yunnan
B198	ind_CHN_MC29	3KRGP	MC	Jiefangxian	12-00644	indica	Jiangxi
B207	ind_CHN_MC30	3KRGP	MC	Aihechi	12-02280	indica	Jiangxi
B210	ind_CHN_MC32	3KRGP	MC	Nanxiongzaoyouzhan	15-03057	indica	Guangdong
B214	ind_CHN_MC33	3KRGP	MC	Xuanenchangtanqingzhan	17-00966	indica	Hubei
B217	ind_CHN_MC34	3KRGP	MC	Honggu	I1A24643	indica	Zhejiang
B219	ind_CHN_MC35	3KRGP	MC	Haolai	21-02824	indica	Yunnan
B244	ind_CHN_MC39	3KRGP	MC	Xiangdao	I1A14140	indica	Shangdong
B259	ind_CHN_MC41	3KRGP	MC	Leihuozhan	11-00403	indica	Anhui
B261	ind_CHN_MC43	3KRGP	MC	Meihuanuo	20-02073	indica	Sichuan
B264	ind_CHN_MC44	3KRGP	MC	Sanbaili	I1A04386	indica	Fujian
B265	ind_CHN_MC45	3KRGP	MC	Wukezhan	13-01006	indica	Fujian
B268	ind_CHN_MC46	3KRGP	MC	Nangaogu	21-03121	indica	Yunnan
B073	ind_CHN_MC47	3KRGP	MC	Jinxibai2	12-00589	indica	Jiangxi
B096	ind_CHN_MC48	3KRGP	MC	Jinzhinuo4	21-03433	indica	Yunnan
B213	ind_CHN_MC52	3KRGP	MC	Liuyenian	17-00524	indica	Hubei
B224	ind_CHN_MC54	3KRGP	MC	Younian	I1A11073	indica	Jiangxi
21327	IND-13	Wang et al., 2021*	NMGR	Yunnanbai		indica	Hubei
22233	IND-16	Wang et al., 2021*	NMGR	Qianainuo		indica	Guizhou
36467	IND-24	Wang et al., 2021*	NMGR	Yanweizhan		indica	Guangxi
60993	IND-29	Wang et al., 2021*	NMGR	Dayezhong		indica	Jiangxi
B088	ind_CHN_MC11	3KRGP	MC	San**Qishiluo	21-00529	indica	Yunnan
B090	ind_CHN_MC12	3KRGP	MC	Zimi	21-01106	indica	Yunnan
B091	ind_CHN_MC13	3KRGP	MC	Xiaohonggu	I1A58829	indica	Sanxi
B092	ind_CHN_MC14	3KRGP	MC	Gongju 73	21-01899	indica	Yunnan
B135	ind_CHN_MC25	3KRGP	MC	Honggenghangu3	16-02459	indica	Guangxi
B227	ind_CHN_MC37	3KRGP	MC	Menjiagao 1	31-00032	indica	Hainan
B229	ind_CHN_MC38	3KRGP	MC	Menjiading 2	31-00042	indica	Hainan
B246	ind_CHN_MC40	3KRGP	MC	Laozaogu	21-01744	indica	Yunnan
B097	ind_CHN_MC49	3KRGP	MC	Jiienuo	21-03781	indica	Yunnan
B147	ind_CHN_MC50	3KRGP	MC	Baikehanhe	22-03232	indica	Guizhou
B216	ind_CHN_MC53	3KRGP	MC	Hanmadao4	19-00205	indica	Henan
24380	IND-17	Wang et al., 2021*	NMGR	Laopigu		indica	Yunnan
41949	IND-25	Wang et al., 2021*	NMGR	Menhua		indica	Hainan
Japonica (39)
B056	tej_CHN_MC02	3KRGP	MC	Tieganwu	10-00463	Temperate japonica	Zhejiang
B068	tej_CHN_MC03	3KRGP	MC	Gaoyangdiandao dahongmang	02-00210	Temperate japonica	Hebei
B070	tej_CHN_MC05	3KRGP	MC	Laoguangtou 83	07-00010	Temperate japonica	Heilongjiang
B071	tej_CHN_MC06	3KRGP	MC	Muxiqiu	I1A38083	Temperate japonica	Jiangsu
B077	tej_CHN_MC07	3KRGP	MC	Yizhixiang	I1A04432	Temperate japonica	Fujian
B100	tej_CHN_MC08	3KRGP	MC	Hongkezhenuo	22-01843	Temperate japonica	Guizhou
B102	tej_CHN_MC09	3KRGP	MC	Maguzi	I1A06732	Temperate japonica	Guangxi
B103	tej_CHN_MC10	3KRGP	MC	Laohongdao	24-00215	Temperate japonica	Sanxi
B109	tej_CHN_MC11	3KRGP	MC	Lengshuigu 2	21-01970	Temperate japonica	Yunnan
B110	tej_CHN_MC12	3KRGP	MC	Huangpinuo	21-02619	Temperate japonica	Yunnan
B136	tej_CHN_MC14	3KRGP	MC	Yuyannuo	21-02235	Temperate japonica	Yunnan
B148	tej_CHN_MC15	3KRGP	MC	Lengshuinuo	21-01989	Temperate japonica	Yunnan
B160	tej_CHN_MC16	3KRGP	MC	Shuiyuan 300Li	02-00294	Temperate japonica	Hebei
B161	tej_CHN_MC17	3KRGP	MC	Yelicanghua	02-00295	Temperate japonica	Hebei
B199	tej_CHN_MC18	3KRGP	MC	Hongmisandan	12-02850	Temperate japonica	Jiangxi
B204	tej_CHN_MC19	3KRGP	MC	Longhuamaohu	02-00133	Temperate japonica	Hebei
B218	tej_CHN_MC22	3KRGP	MC	Wuzidui	21-01577	Temperate japonica	Yunnan
B223	tej_CHN_MC23	3KRGP	MC	Cungunuo	I1A47112	Temperate japonica	Guizhou
B226	tej_CHN_MC24	3KRGP	MC	Heimangdao	28-00005	Temperate japonica	Ningxia
B258	tej_CHN_MC26	3KRGP	MC	Xingguo	06-00035	Temperate japonica	Jilin
B212	tej_CHN_MC28	3KRGP	MC	Chikenuo	I1A04672	Temperate japonica	Fujian
B225	tej_CHN_MC29	3KRGP	MC	Guantuibaihe 1	22-03815	Temperate japonica	Guizhou
680	TEJ-1	Wang et al., 2021*	NMGR	Lizhihong		Temperate japonica	Zhejiang
20708	TEJ-10	Wang et al., 2021*	NMGR	Yengshuidao		Temperate japonica	Shanxi
20721	TEJ-11	Wang et al., 2021*	NMGR	Qinsen5		Temperate japonica	Liaoning
20876	TEJ-12	Wang et al., 2021*	NMGR	Sishangyu		Temperate japonica	Jiangsu
B101	jap_CHN_MC01	3KRGP	MC	Yangkenuo	22-04053	japonica	Guizhou
B069	tej_CHN_MC04	3KRGP	MC	Dandongludao	05-00052	Temperate japonica	Liaoning
B111	tej_CHN_MC13	3KRGP	MC	Zimangfeie	22-02423	Temperate japonica	Guizhou
B205	tej_CHN_MC20	3KRGP	MC	Cunsanli	I1A08731	Temperate japonica	Jiangsu
B228	tej_CHN_MC25	3KRGP	MC	Haobayong 1	21-01853	Temperate japonica	Yunnan
B230	tej_CHN_MC30	3KRGP	MC	Banjiemang2	21-03879	Temperate japonica	Yunnan
49357	TEJ-27	This Study	NMGR	Xianggengnuo		Temperate japonica	Guangdong
B134	trj_CHN_MC31	3KRGP	MC	Xishi 15	15-04286	Tropical japonica	Guangdong
B241	trj_CHN_MC32	3KRGP	MC	Lamujia	21-02089	Tropical japonica	Yunnan
B245	trj_CHN_MC33	3KRGP	MC	Shanjiugu	I1A44229	Tropical japonica	Sichuan
B266	trj_CHN_MC34	3KRGP	MC	Haomake (K)	21-00083	Tropical japonica	Yunnan
22128	TRJ-15	Wang et al., 2021*	NMGR	Guangkehongmigengzhan		Tropical japonica	Guizhou
32447	TRJ-22	Wang et al., 2021*	NMGR	Jiegunuo		Tropical japonica	Yunnan
1 3KRGP = The 3,000 Rice Project.
2 MC means the mini-core collection accessions established by China Agricultural University, other accessions were obtained from the National Mid-term Genebank of Rice (Hangzhou, China)
3 Classified by the 3,000 rice project
* Accessions also used in RNA sequencing
