# Supplementary figures and images for: Differentiation of Morphological Traits and Genome-Wide Expression Patterns between Rice Subspecies Indica and Japonica
Source: MDPI journal article supplement (doi:10.3390/genes14101971), 2023-10-21

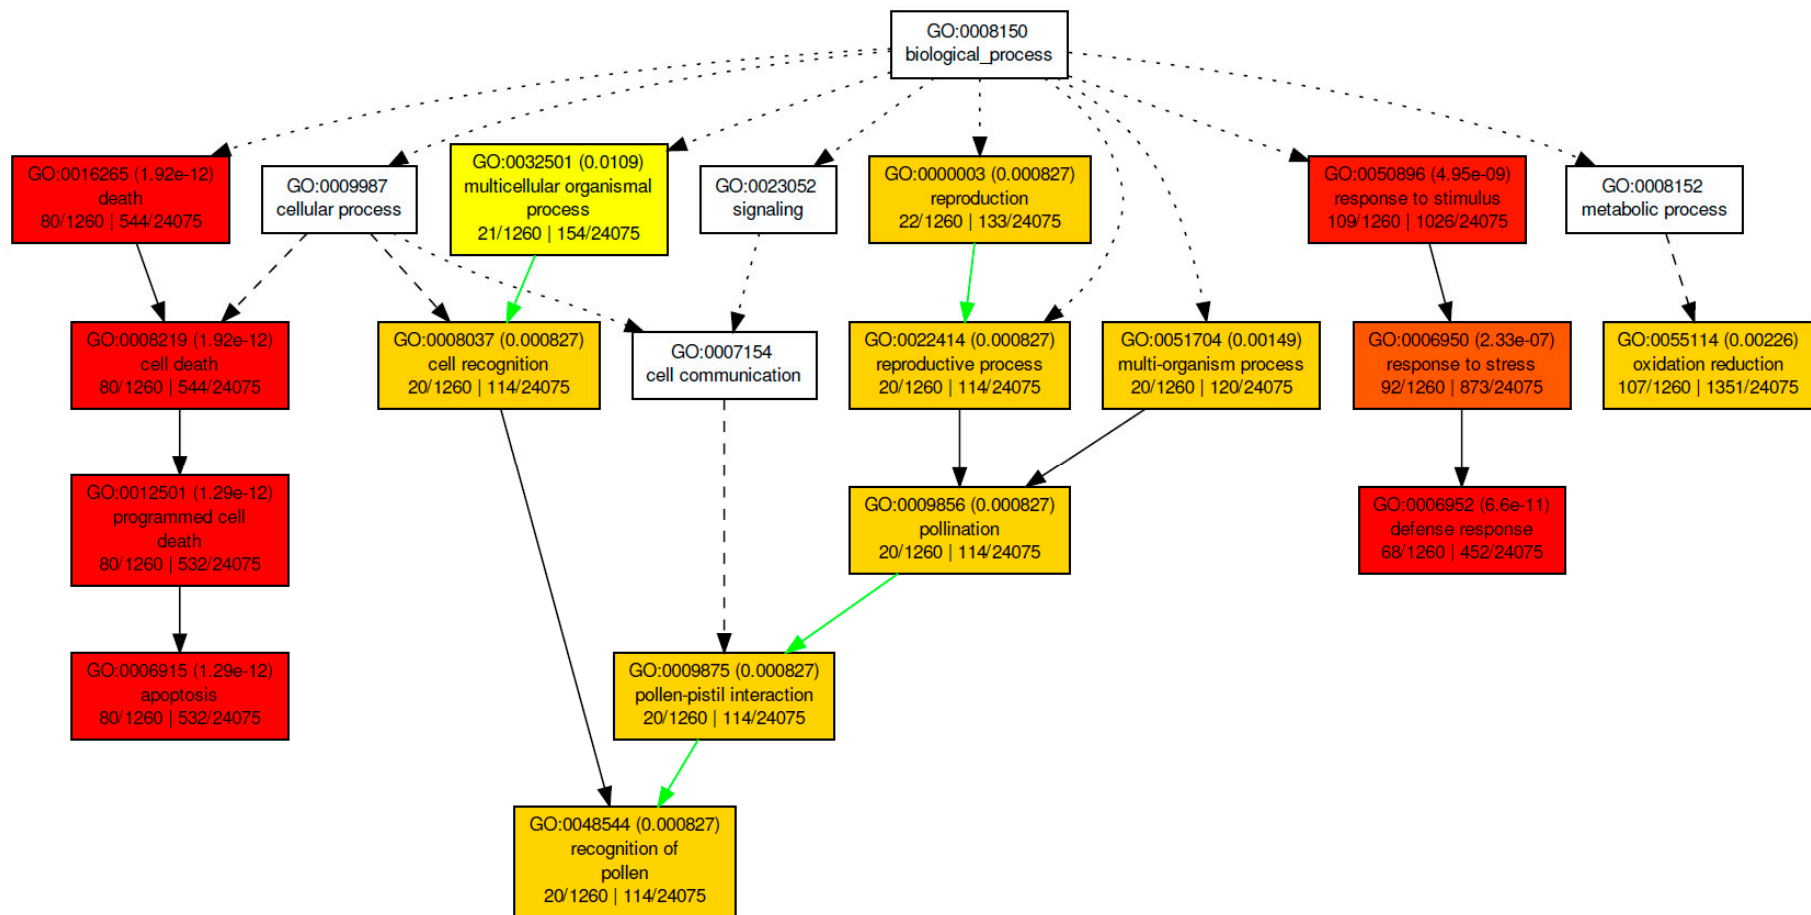

**Figure S1. Gene ontology (GO) enrichment of the DEGs between *Indica* and *Japonica* rice in PH tissue**

Supplement: s1 [file s1]
